# Supplementary material for: Negative Consequences on the Growth, Morphometry, and Community Structure of the Kelp Macrocystis pyrifera (Phaeophyceae, Ochrophyta) by a Short Pollution Pulse of Heavy Metals and PAHs
Source: MDPI journal article supplement (doi:10.3390/toxics9080190), 2021-08-18
Supplement: s1 [file s1]

# Supplementary Materials: Negative Consequences on the Growth, Morphometry, and Community Structure of the Kelp *Macrocystis pyrifera* (Phaeophyceae, Ochrophyta) by A Short Pollution Pulse of Heavy Metals and PAHs

Roddy Jara-Yáñez, Andrés Meynard, Gladys Acosta, Nicolás Latorre-Padilla, Carolina Oyarzo-Miranda, Francisco Castañeda, Florentina Piña, Jorge Rivas, Cristian Bulboa and Loretto Contreras-Porcia

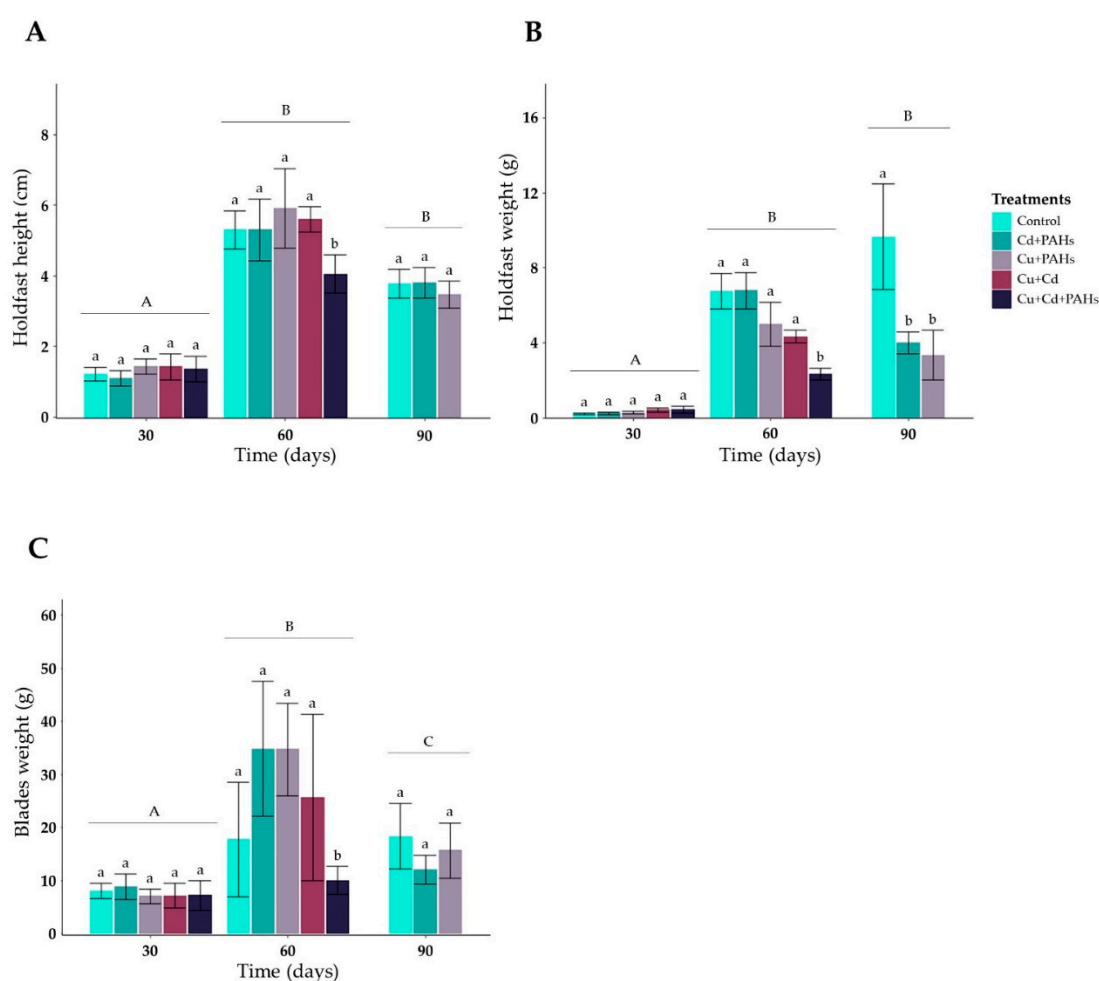

**Figure S1.** Morphometry of *M. pyrifera*: holdfast height (A), holdfast weight (B), and blade weight (C).  $n = 5 \pm$  standard error. The significant differences between the treatments are shown with small letters, and differences between the times of culture are shown with capital letters ( $p < 0.05$ ).

**Table S1.** Analysis of variance (ANOVA) of a generalized linear model (GLM) of morphometric measurements (blade length, the number of blades, and blade weight) at 90 days of cultivation in response to combined contaminants (Cu + Cd, Cu + PAHs, Cd + PAHs, and Cu + Cd + PAHs). \* Corresponds to a statistical interaction between groups.

| Predictors             | Blades Length          |           |          | No. of Blades |           |          | Blades Weight |           |          |
|------------------------|------------------------|-----------|----------|---------------|-----------|----------|---------------|-----------|----------|
|                        | Inc. Rate <sup>1</sup> | Ratios CI | <i>p</i> | Inc. Rate     | Ratios CI | <i>p</i> | Inc. Rate     | Ratios CI | <i>p</i> |
| (Intercept)            | 8.02                   | 7.28–8.81 | <0.001   | 4.28          | 3.72–4.89 | <0.001   | 8.88          | 3.24–18.9 | <0.001   |
| Control                | 0.99                   | 0.86–1.14 | 0.885    | 1.01          | 0.83–1.23 | 0.898    | 0.90          | 0.27–3.14 | 0.868    |
| Cu + Cd                | 0.98                   | 0.85–1.12 | 0.769    | 1.08          | 0.89–1.31 | 0.433    | 0.81          | 0.20–2.98 | 0.746    |
| Cu + Cd + PAHs         | 1.01                   | 0.89–1.16 | 0.832    | 0.90          | 0.73–1.10 | 0.301    | 0.81          | 0.21–2.99 | 0.746    |
| Cu + PAHs              | 0.94                   | 0.82–1.08 | 0.402    | 1.05          | 0.86–1.28 | 0.616    | 0.79          | 0.20–2.94 | 0.725    |
| Time 30                | 1.84                   | 1.42–2.35 | <0.001   | 0.61          | 0.32–1.05 | 0.103    | -             | -         | -        |
| Time 60                | 3.06                   | 2.49–3.73 | <0.001   | 3.79          | 2.87–4.93 | <0.001   | 3.92          | 1.60–11.6 | 0.008    |
| Time 90                | 1.85                   | 1.39–2.42 | <0.001   | 2.63          | 1.84–3.65 | <0.001   | 1.35          | 0.40–4.70 | 0.625    |
| Con-trol*Time 30       | 1.07                   | 0.76–1.50 | 0.701    | 1.27          | 0.59–2.81 | 0.550    | -             | -         | -        |
| Cu + Cd*Time 30        | 1.07                   | 0.75–1.52 | 0.711    | 1.28          | 0.59–2.88 | 0.536    | -             | -         | -        |
| Cu + Cd + PAHs*Time 30 | 1.56                   | 1.13–2.17 | 0.007    | 0.60          | 0.21–1.59 | 0.318    | -             | -         | -        |
| Cu + PAHs *Time 30     | 1.20                   | 0.85–1.70 | 0.307    | 1.17          | 0.52–2.67 | 0.703    | -             | -         | -        |
| Con-trol*Time 60       | 0.87                   | 0.64–0.19 | 0.398    | 0.41          | 0.24–0.67 | 0.001    | 0.56          | 0.13–2.41 | 0.443    |
| Cu + Cd*Time 60        | 0.72                   | 0.50–1.02 | 0.070    | 0.67          | 0.41–1.05 | 0.088    | 0.91          | 0.20–4.36 | 0.909    |
| Cu + Cd + PAHs*Time 60 | 0.60                   | 0.44–0.81 | 0.001    | 0.36          | 0.22–0.57 | <0.001   | 0.36          | 0.07–1.74 | 0.198    |
| Cu+PAHs *Time 60       | 0.99                   | 0.71–1.37 | 0.955    | 0.74          | 0.47–1.16 | 0.204    | 1.26          | 0.28–5.88 | 0.762    |
| Con-trol*Time 90       | 1.45                   | 1.03–2.04 | 0.034    | 0.95          | 0.61–1.50 | 0.826    | 1.69          | 0.35–8.41 | 0.512    |
| Cu+PAHs *Time 90       | 0.93                   | 0.60–1.42 | 0.725    | 0.65          | 0.36–1.13 | 0.138    | 1.65          | 0.28–10.0 | 0.579    |

<sup>1</sup>Incidence Rate.

**Table S2.** Analysis of variance (ANOVA) of a generalized linear model (GLM) on morphometric measurements (holdfast width, height, weight, and total weight) at 90 days of cultivation in response to combined contaminants (Cu+Cd, Cu+PAHs, Cd+PAHs, and Cu+Cd+PAHs). \* Corresponds to a statistical interaction between groups.

| Predictors  | Holdfast Width         |           |          | Holdfast Height |           |          | Holdfast Weight |           |          | Total Weight <sup>2</sup> |           |          |
|-------------|------------------------|-----------|----------|-----------------|-----------|----------|-----------------|-----------|----------|---------------------------|-----------|----------|
|             | Inc. Rate <sup>1</sup> | Ratios CI | <i>p</i> | Inc. Rate       | Ratios CI | <i>p</i> | Inc. Rate       | Ratios CI | <i>p</i> | Inc. Rate                 | Ratios CI | <i>p</i> |
| (Intercept) | 0.26                   | 0.22–0.29 | <0.001   | 1.10            | 0.65–1.72 | 0.699    | 0.24            | 0.03–0.87 | 0.095    | 0.53                      | 0.33–0.79 | 0.004    |
| Control     | 1.14                   | 0.95–1.38 | 0.169    | 1.11            | 0.59–2.12 | 0.757    | 0.90            | 0.08–11.7 | 0.930    | 1.05                      | 0.57–1.94 | 0.872    |
| Cu+Cd       | 0.94                   | 0.77–1.15 | 0.550    | 1.29            | 0.68–2.48 | 0.437    | 1.75            | 0.23–20.3 | 0.596    | 1.06                      | 0.58–1.95 | 0.850    |
| Cu+Cd+PAHs  | 1.06                   | 0.87–1.28 | 0.578    | 1.24            | 0.65–2.39 | 0.522    | 1.83            | 0.25–21.1 | 0.563    | 1.17                      | 0.65–2.15 | 0.597    |
| Cu+PAHs     | 1.02                   | 0.84–1.24 | 0.846    | 1.29            | 0.68–2.48 | 0.437    | 1.17            | 0.11–14.8 | 0.893    | 0.98                      | 0.52–1.84 | 0.947    |
| Time 30     | 5.13                   | 4.02–6.50 | <0.001   | -               | -         | -        | -               | -         | -        | 17.4                      | 10.1–30.6 | <0.001   |
| Time 60     | 26.2                   | 22.3–30.9 | <0.001   | 4.82            | 2.92–8.45 | <0.001   | 28.3            | 7.45–269  | <0.001   | 79.5                      | 51.5–129  | <0.001   |
| Time 90     | 18.1                   | 15.1–21.7 | <0.001   | 3.45            | 2.02–6.22 | <0.001   | 16.6            | 4.16–161  | 0.002    | 31.2                      | 18.9–53.4 | <0.001   |

|                            |      |           |                  |      |           |       |      |           |       |      |           |                  |
|----------------------------|------|-----------|------------------|------|-----------|-------|------|-----------|-------|------|-----------|------------------|
| Con-<br>trol*Time<br>30    | 1.07 | 0.78–1.48 | 0.670            | -    | -         | -     | -    | -         | -     | 0.86 | 0.40–1.86 | 0.701            |
| Cu+Cd*Ti<br>me 30          | 1.38 | 1.00–1.93 | 0.054            | -    | -         | -     | -    | -         | -     | 0.79 | 0.36–1.73 | 0.552            |
| Cu+Cd+P<br>AHs*<br>Time 30 | 1.26 | 0.91–1.75 | 0.163            | -    | -         | -     | -    | -         | -     | 0.71 | 0.32–1.54 | 0.381            |
| Cu+PAHs<br>*Time 30        | 1.41 | 1.02–1.96 | <b>0.038</b>     | -    | -         | -     | -    | -         | -     | 0.81 | 0.36–1.84 | 0.616            |
| Con-<br>trol*Time<br>60    | 0.69 | 0.54–0.87 | <b>0.002</b>     | 0.90 | 0.44–1.84 | 0.783 | 1.10 | 0.08–13.6 | 0.936 | 0.55 | 0.28–1.09 | 0.086            |
| Cu+Cd*Ti<br>me 60          | 0.62 | 0.48–0.81 | <b>&lt;0.001</b> | 0.82 | 0.39–1.69 | 0.593 | 0.36 | 0.03–3.00 | 0.359 | 0.67 | 0.34–1.32 | 0.249            |
| Cu+Cd+P<br>AHs*<br>Time 60 | 0.47 | 0.37–0.60 | <b>&lt;0.001</b> | 0.62 | 0.30–1.27 | 0.196 | 0.19 | 0.02–1.49 | 0.127 | 0.24 | 0.12–0.48 | <b>&lt;0.001</b> |
| Cu+PAHs<br>*Time 60        | 0.67 | 0.52–0.86 | <b>0.002</b>     | 0.86 | 0.41–1.78 | 0.691 | 0.63 | 0.05–7.34 | 0.696 | 0.95 | 0.48–1.89 | 0.880            |
| Con-<br>trol*Time<br>90    | 1.11 | 0.87–1.41 | 0.402            | 0.90 | 0.43–1.88 | 0.781 | 2.68 | 0.20–33.5 | 0.411 | 1.59 | 0.79–3.21 | 0.189            |
| Cu+PAHs<br>*Time 90        | 0.99 | 0.76–1.30 | 0.958            | 0.71 | 0.32–1.54 | 0.389 | 0.71 | 0.05–8.64 | 0.780 | 1.24 | 0.58–2.64 | 0.578            |

<sup>1</sup>Incidence Rate, <sup>2</sup>Holdfast plus blades weight

**Table S3.** Analysis of variance (ANOVA) of a generalized linear model (GLM) of the community descriptors (Shannon–Wiener, Simpson, and Pielou) at 90 days of cultivation in response to combined contaminants (Cu+Cd, Cu+PAHs, Cd+PAHs, and Cu+Cd+PAHs). Those that present statistical differences are highlighted.

| Index                                    | Condition                | Deviance | Resid. Dev | F     | Pr(>F)       |
|------------------------------------------|--------------------------|----------|------------|-------|--------------|
| Diversity of<br>Shannon–Wie-<br>ner (H') | Pollutant                | 0.032    | 19.459     | 0.047 | 0.954        |
|                                          | Treatment                | 2.725    | 16.734     | 3.954 | <b>0.028</b> |
|                                          | Pollutant:Treat-<br>ment | 0.437    | 16.297     | 0.317 | 0.865        |
| Simpson Equi-<br>tability (D')           | Pollutant                | 0.077    | 9.499      | 0.232 | 0.794        |
|                                          | Treatment                | 1.223    | 8.276      | 3.687 | <b>0.035</b> |
|                                          | Pollutant:Treat-<br>ment | 0.190    | 8.086      | 0.287 | 0.884        |
| Pielou Index (J')                        | Pollutant                | 0.395    | 11.509     | 1.028 | 0.368        |
|                                          | Treatment                | 1.541    | 9.968      | 4.012 | <b>0.026</b> |
|                                          | Pollutant:Treat-<br>ment | 0.210    | 9.758      | 0.274 | 0.893        |
